# Supplementary material
Source: PubMed Central journal article supplement (PMC4051143)
Supplement: NIHMS578302-supplement-01.pdf [file NIHMS578302-supplement-01.pdf]

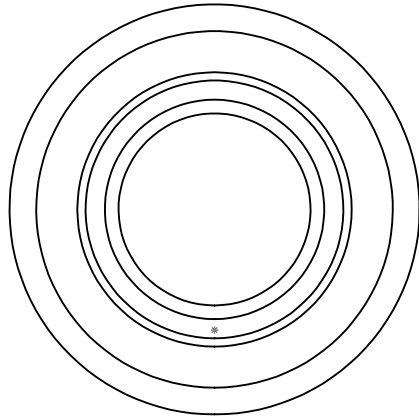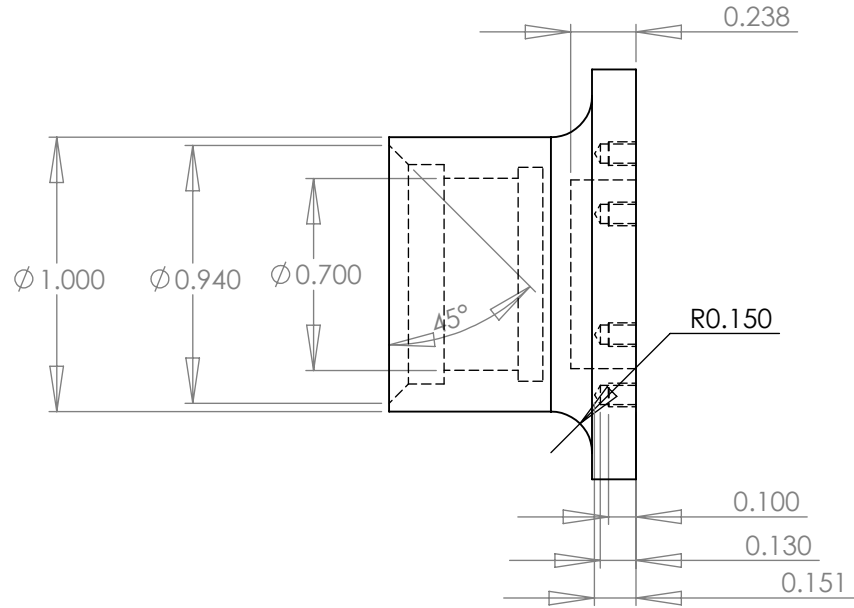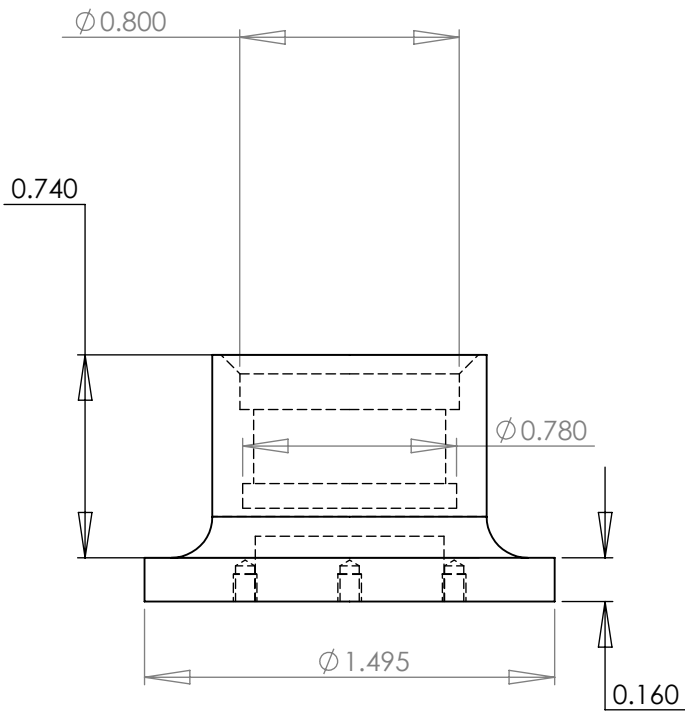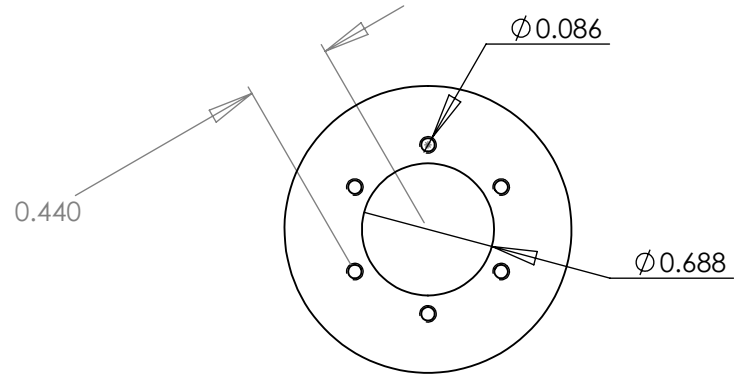

|                                      |  |           |      |                                           |              |
|--------------------------------------|--|-----------|------|-------------------------------------------|--------------|
| UNLESS OTHERWISE SPECIFIED:          |  | NAME      | DATE | <b><i>NIH</i></b>                         |              |
| DIMENSIONS ARE IN INCHES             |  | DRAWN     |      | TITLE:<br><b>Centrifuge center Holder</b> |              |
| TOLERANCES:                          |  | CHECKED   |      |                                           |              |
| FRACTIONAL ±                         |  | ENG APPR. |      |                                           |              |
| ANGULAR: MACH ± BEND ±               |  | MFG APPR. |      |                                           |              |
| TWO PLACE DECIMAL ±                  |  | Q.A.      |      | SIZE                                      | DWG. NO.     |
| THREE PLACE DECIMAL ±                |  | COMMENTS: |      | <b>A</b>                                  |              |
| INTERPRET GEOMETRIC TOLERANCING PER: |  |           |      | SCALE: 1:1                                | WEIGHT:      |
| MATERIAL                             |  |           |      |                                           | SHEET 1 OF 1 |
| FINISH                               |  |           |      |                                           |              |
| DO NOT SCALE DRAWING                 |  |           |      |                                           |              |

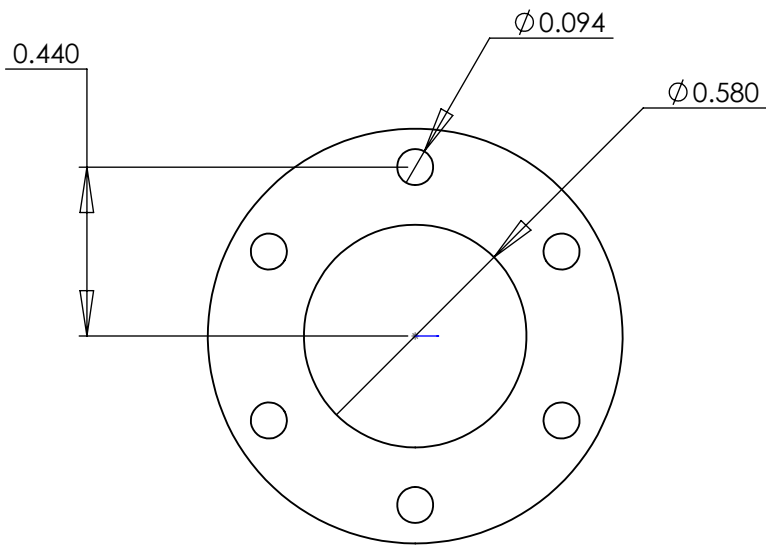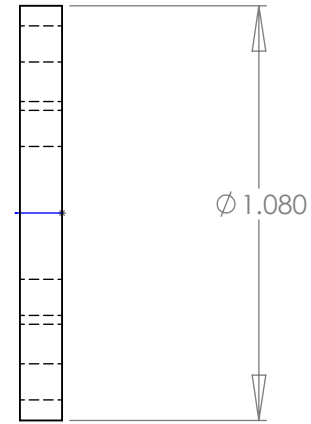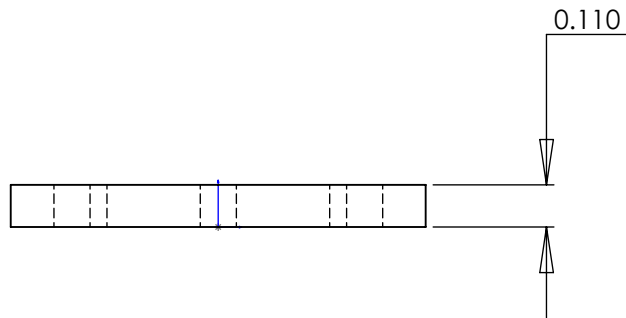

|                                                                                                                                                                                                                                                                                               |           |            |         |                                                |          |     |
|-----------------------------------------------------------------------------------------------------------------------------------------------------------------------------------------------------------------------------------------------------------------------------------------------|-----------|------------|---------|------------------------------------------------|----------|-----|
| UNLESS OTHERWISE SPECIFIED:<br><br>DIMENSIONS ARE IN INCHES<br>TOLERANCES:<br>FRACTIONAL $\pm$<br>ANGULAR: MACH $\pm$ BEND $\pm$<br>TWO PLACE DECIMAL $\pm$<br>THREE PLACE DECIMAL $\pm$<br><br>INTERPRET GEOMETRIC<br>TOLERANCING PER:<br>MATERIAL<br><br>FINISH<br><br>DO NOT SCALE DRAWING |           | NAME       | DATE    | <b><i>NIH</i></b>                              |          |     |
|                                                                                                                                                                                                                                                                                               |           | DRAWN      |         | TITLE:<br><br><h1 style="margin: 0;">Ring</h1> |          |     |
|                                                                                                                                                                                                                                                                                               |           | CHECKED    |         |                                                |          |     |
|                                                                                                                                                                                                                                                                                               |           | ENG APPR.  |         |                                                |          |     |
|                                                                                                                                                                                                                                                                                               |           | MFG APPR.  |         |                                                |          |     |
|                                                                                                                                                                                                                                                                                               | Q.A.      |            |         | SIZE                                           | DWG. NO. | REV |
|                                                                                                                                                                                                                                                                                               | COMMENTS: |            |         | <b>A</b>                                       |          |     |
|                                                                                                                                                                                                                                                                                               |           | SCALE: 2:1 | WEIGHT: | SHEET 1 OF 1                                   |          |     |
